# Supplementary material for: Thymine photodimer formation in DNA hairpins. Unusual conformations favor (6 − 4) vs. (2 + 2) adducts
Source: Royal Society of Chemistry journal article supplement (doi:10.1039/c3pp50283j), 2013-10-26
Supplement: c3pp50283j.pdf [file c3pp50283j.pdf]

## Electronic Supporting Information

for

### Thymine Photodimer Formation in DNA Hairpins. Unusual Conformations Favor (6-4) vs. (2+2)

Adducts<sup>†‡</sup>

Mahesh Hariharan,<sup>a,b\*</sup> Karsten Siegmund,<sup>a</sup> Clifton Saurel,<sup>a</sup> Martin McCullagh,<sup>a,c</sup>

George C. Schatz,<sup>a</sup> and Frederick D Lewis<sup>a\*</sup>

<sup>a</sup>Department of Chemistry, Northwestern University, Evanston, Illinois 60208-3113, USA.

E-mail: [fdl@northwestern.edu](mailto:fdl@northwestern.edu); Tel: +1 847 491 3441

<sup>b</sup>School of Chemistry, Indian Institute of Science Education and Research Thiruvananthapuram (IISER TVM), Thiruvananthapuram, Kerala, India 695 016

E-mail: [mahesh@iisertvm.ac.in](mailto:mahesh@iisertvm.ac.in); Tel: +91 471 2599413

<sup>c</sup>Department of Chemistry, University of Chicago, Chicago, Illinois 60637

#### Contents

| page | content                                                                                     |
|------|---------------------------------------------------------------------------------------------|
| 2    | Experimental Section                                                                        |
| 3    | References                                                                                  |
| 4    | Tables S1-S3, MALDI, T <sub>m</sub> , and NMR data for <b>H<sub>4</sub>2</b>                |
| 5    | Figure S1. Thermal dissociation profiles                                                    |
| 6-7  | Figures S2-4. NMR spectra for <b>H<sub>4</sub>2</b> and Figure S5 for <b>H<sub>6</sub>3</b> |
| 8    | Figures S6-7 2D NMR spectra for (2+2) and (6-4) adducts of <b>H<sub>6</sub>3</b>            |
| 9-14 | Figures S8-S16 HPLC and UV data for irradiated solutions of hairpins                        |
| 15   | Figure S17. Calculated UV spectra                                                           |

## Experimental Section

Oligonucleotide conjugates containing TT steps (Chart 1) were prepared using standard phosphoramidite chemistry starting from 5'-phosphate CPG as solid support using a Millipore Expedite DNA synthesizer and following the procedure of Letsinger and Wu.<sup>1</sup> Following synthesis, the conjugates were isolated as trityl-on derivatives by reverse phase (RP) HPLC, detritylated in 80 % acetic acid for 30 min, and repurified by RP-HPLC as needed. RP-HPLC analysis was carried out on a Dionex chromatograph with a Hewlett-Packard Hypersil ODS-5 column (4.6 x 250 mm) and a 1% gradient of acetonitrile in 0.03 M triethylammonium acetate buffer (pH 7.0) with a flow rate of 1.0 mL/min. Molecular weights were determined following desalting by means of MALDI-TOF mass spectroscopy (Table S1, ElectSupporting Information).

Solutions containing ca. 1-1.2  $\mu$ M hairpin in 10 mM phosphate buffer (pH 7.2) with 1.0 M NaCl were irradiated at 280 nm using a Xenon arc lamp and monochromator (ca. 2 mW) at 10 °C in 1 cm path-length quartz cuvettes. Aliquots irradiated for different time intervals were analyzed by high performance liquid chromatography (HPLC; Waters 600) on a C18 reversed phase column (MICROSORB-MV 100-5 C18, 250 x 4.6 MM VALCO) equipped with a diode array detector (Waters PDA 996) using a column temperature of 60 °C with a UV detection wavelength of 260 nm, corresponding to the absorption maxima of the base pairs. A linear gradient of 20 mM ammonium acetate containing 0-30% CH<sub>3</sub>CN with a flow rate of 1 mL/min for 40 min was used. Under these conditions, starting material and the product eluted with different characteristic retention time. The assignments of product peaks to cyclobutane adduct has been previously described.<sup>2</sup> Product yields were determined from the initial slopes of plots of peak area vs. irradiation time. Light intensities were determined using ferrioxalate actinometry.<sup>3</sup>

**NMR Spectra:** Samples of hairpin sequences used for NMR experiments were lyophilized four times from aqueous NH<sub>4</sub>OH solution (10%) to remove residual triethylamine. The samples were dissolved in 200  $\mu$ L of H<sub>2</sub>O/D<sub>2</sub>O (9:1), containing 100 mM NaCl and 10 mM phosphate buffer (pH 7.2) and then transferred to NMR microtubes (Shigemi Co., Tokyo, Japan). The final concentration of the DNA-hairpin was 0.3-0.5 mM.

NMR spectra were recorded using a Varian Inova 600 spectrometer equipped with a Cold Probe. A series of 1D spectra was recorded at temperatures of 5, 10, 20, 30 and 40 °C. All spectra were acquired in 90% H<sub>2</sub>O 10% D<sub>2</sub>O using the WATERGATE pulse sequence for water suppression.<sup>4</sup>

**Calculated UV Spectra.** Minimum energy (AM1 Method) and electronic (ZINDO Hamiltonian) structure calculations of adenine, thymine, (2+2) and (6-4) photoadducts were carried using CAChe 6.1.10.<sup>5</sup>

## References

1. R. L. Letsinger and T. Wu, Use of a stilbenedicarboxamide bridge in stabilizing, monitoring, and photochemically altering folded conformations of oligonucleotides, *J. Am. Chem. Soc.*, 1995, **117**, 7323-7328.
2. M. Hariharan and F. D. Lewis, Context-dependent photodimerization in isolated thymine-thymine steps in DNA, *J. Am. Chem. Soc.*, 2008, **130**, 11870-11871.
3. S. L. Murov, *Handbook of Photochemistry*, Marcel Dekker, New York, 1973.
4. M. Piotto, V. Saudek and V. Sklenar, Gradient-tailored excitation for single-quantum NMR-spectroscopy of aqueous solutions, *J. Biomol. NMR*, 1992, **2**, 661-665.
5. CAChe, CAChe Release 6.1.10, Fujitsu Limited, Miahama-Ku, Chiba City, Chiba, Japan, 2000.

**Table S1.** m/z values determined by MALDI-TOF mass spectrometry and melting temperatures ( $T_M$ ) determined from the derivatives of thermal dissociation profiles.

| Sequence         | m/z<br>Calculated | m/z<br>Found | $T_M$ , °C |
|------------------|-------------------|--------------|------------|
| H <sub>4</sub> 1 | 2674.4            | 2673.8       | 25.4       |
| H <sub>4</sub> 2 | 2674.4            | 2672.4       | 26.1       |
| H <sub>4</sub> 3 | 2674.4            | 2673.5       | 27.5       |
| 2H <sub>4</sub>  | 2674.4            | 2674.1       | 26.7       |
| H <sub>6</sub> 1 | 3904.76           | 3903.6       | 49.5       |
| H <sub>6</sub> 2 | 3904.76           | 3905.9       | 50.5       |
| H <sub>6</sub> 3 | 3904.76           | 3908.1       | 48.8       |
| 2H <sub>6</sub>  | 3904.76           | 3905.1       | 49.1       |
| L <sub>6</sub> 1 | 5503.7            | 5502.41      | 38.4       |
| L <sub>6</sub> 2 | 5503.7            | 5504.84      | 44.6       |
| L <sub>6</sub> 3 | 5503.7            | 5501.89      | 35.5       |
| SS1              | 1791.26           | 1791.71      |            |

**Table S2.** Proton assignments for chemical shifts of H<sub>4</sub>2 at 17 °C

| Base | H1'   | H2'   | H2''  | H3'   | H4'   | H6    | H8    | H2    | M7    |
|------|-------|-------|-------|-------|-------|-------|-------|-------|-------|
| A1   | 6.267 | 2.898 | 2.779 | 4.914 | 4.323 |       | 8.246 | 7.985 |       |
| T2   | 6.116 | 2.531 | 2.175 | 4.909 | 4.282 | 7.471 |       |       | 1.432 |
| T3   | 5.885 | 2.265 | 1.841 | 4.801 | 4.177 | 7.369 |       |       | 1.752 |
| A4   | 6.315 | 2.864 | 2.755 | 5.082 | 4.453 |       | 8.409 | 7.914 |       |
| T6   | 5.646 | 2.447 | 2.249 | 4.862 | 4.137 | 7.56  |       |       | 1.912 |
| A7   | 6.02  | 2.925 | 2.825 | 5.078 | 4.424 |       | 8.318 |       |       |
| A8   | 6.286 | 2.882 | 2.703 | 5.032 | 4.501 |       | 8.236 |       |       |
| T9   | 6.124 | 2.206 | 2.19  | 4.553 | 4.077 | 7.261 |       |       | 1.46  |

**Table S3.** Assignments of C12 linker proton chemical shifts (see Table 1 for numbering). Two values are given if two peaks were assigned for the methylene group, the second field is left blank if only one resonance was assigned.

| C1    | C2    | C3    | C4    | C5    | C6 | C7 | C8                 | C9                 | C10                | C11   | C12 |
|-------|-------|-------|-------|-------|----|----|--------------------|--------------------|--------------------|-------|-----|
| 3.864 | 1.438 | 1.020 | 0.808 | 0.440 |    |    | 0.638 <sup>a</sup> | 0.729              | 0.915              | 1.334 |     |
|       |       |       | 0.730 | 0.318 |    |    | 0.468 <sup>a</sup> | 0.638 <sup>a</sup> | 0.808 <sup>a</sup> |       |     |

<sup>a</sup> Assignments of these protons are less certain.

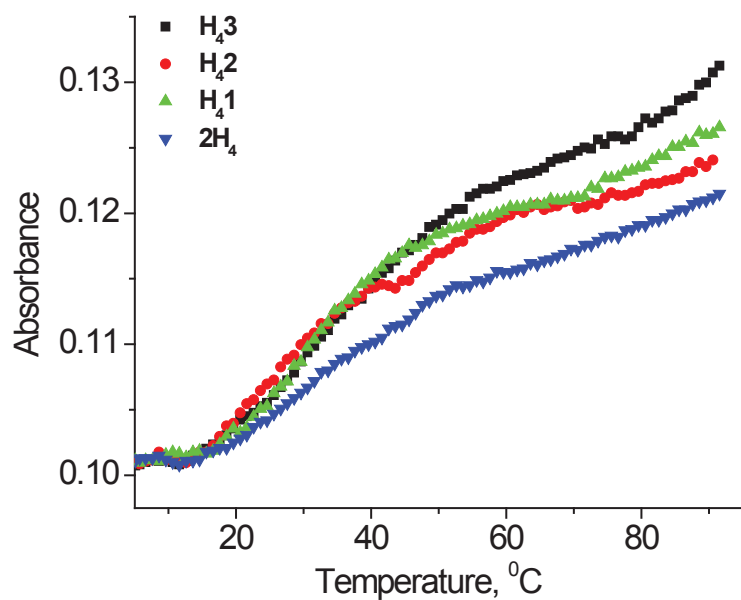

**Fig. S1** Thermal dissociation profiles for the a) alkane-linked hairpins having 4 AT base pairs in 10 mM phosphate buffer (pH 7.2) containing 100 mM NaCl.

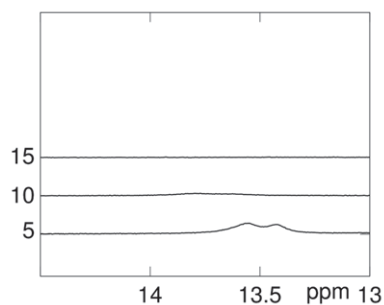

**Fig. S2** Temperature dependent 1D NMR spectra for the thymine H3 imino protons of conjugates **H<sub>42</sub>** in 90 % H<sub>2</sub>O, 10 % D<sub>2</sub>O (10 mM phosphate buffer, 100 mM NaCl).

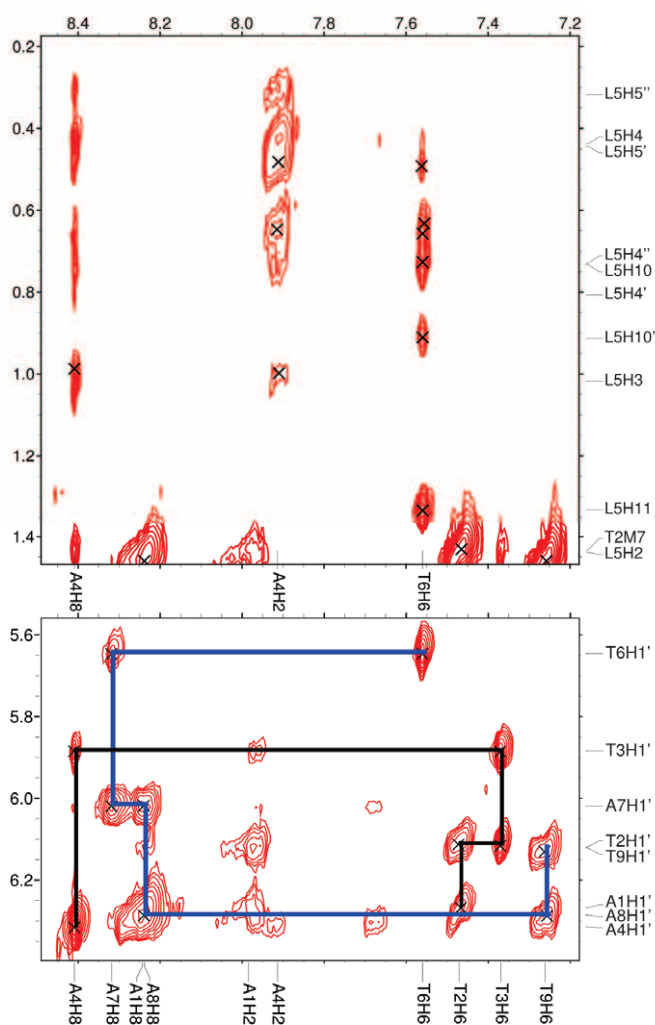

**Fig. S3** Sequential assignments for **H<sub>42</sub>** obtained using base protons (7.2-9.8ppm), H1' (5.5-6.5 ppm) and linker protons (0.2 -1.4 ppm). The 5' strand is drawn in black, 3' strand drawn in blue. The NOESY spectra for **H<sub>42</sub>** (10 mM phosphate buffer, 100 mM NaCl) is recorded at 20 °C with a mixing time of 250 ms.

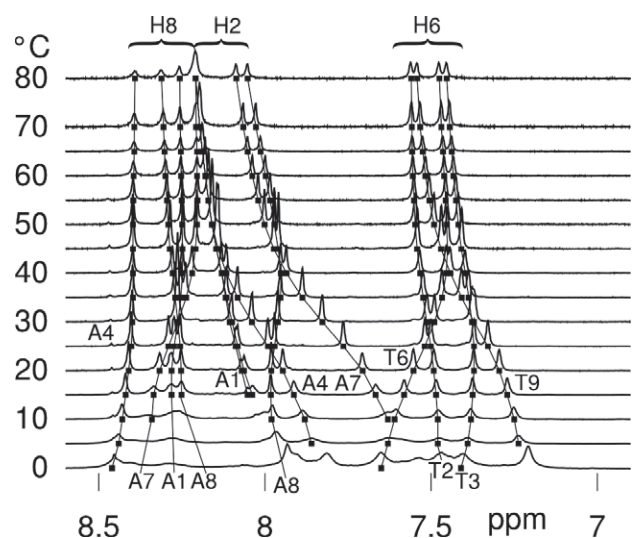

**Fig. S4** Temperature dependent 1D NMR spectra for aromatic region of **H<sub>42</sub>** (10 mM phosphate buffer, 100 mM NaCl). Assignments of nucleotide type and number are shown next to the peaks and are reported in Table S2.

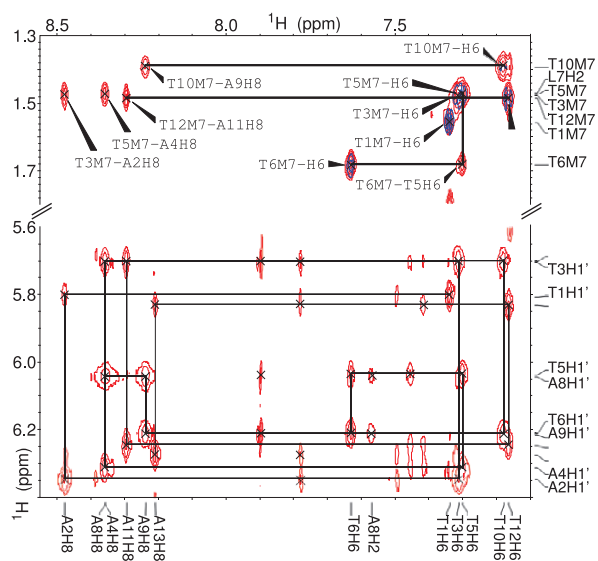

**Fig. S5** Overlay of the NOESY spectrum (red) and TOCSY spectrum (blue) of **H<sub>63</sub>** recorded at 20 °C. Shown is the region containing crosspeaks for the sequential assignment ( H1' and H6/H8 ) and the region of crosspeaks with H6/H8 with thymidine methyl groups (M7).The sequential H1'-H6/H8 and M7-H6/H8 connectivities of close proton contact peaks are shown as lines.

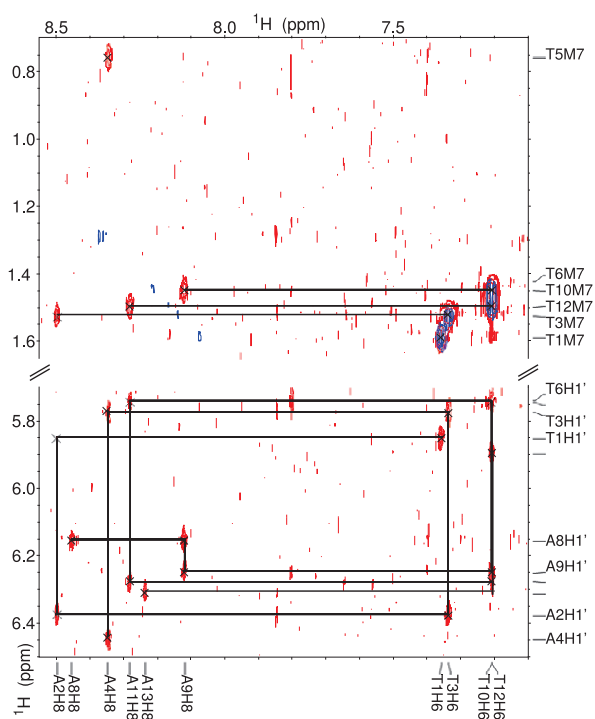

**Fig. S6** Overlay of NOESY spectrum (red) and TOCSY spectra (blue) of the (2+2) photoadduct of **H<sub>6</sub>3** recorded at 20°C. Shown is the region containing crosspeaks for the sequential assignment ( H1' and H6/H8 ) and the region of crosspeaks with H6/H8 with thymidine methyl groups (M7). The sequential H1'-H6/H8 and M7-H6/H8 connectivities of close proton contact peaks are shown as lines.

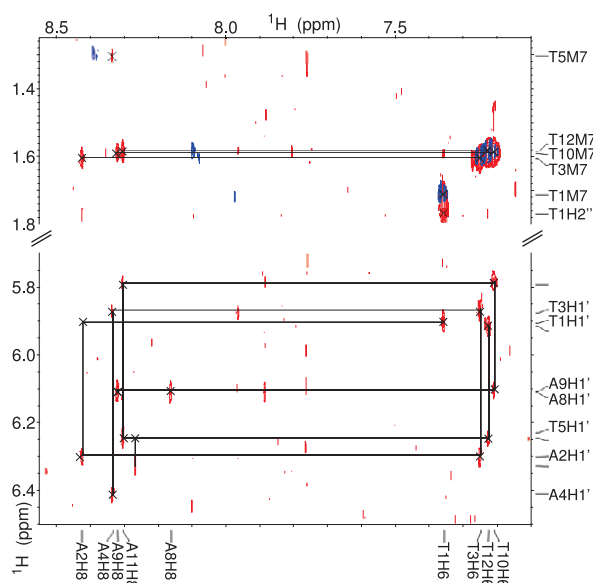

**Fig. S7** Overlay of NOESY spectrum (red) and TOCSY spectrum (blue) of the (6-4) photoadduct of **H<sub>6</sub>3** recorded at 20°C. Shown is the region containing crosspeaks for the sequential assignment ( H1' and H6/H8 ) and the region of crosspeaks with H6/H8 with thymidine methyl groups (M7). The sequential H1'-H6/H8 and M7-H6/H8 connectivities of close proton contact peaks are shown as lines.



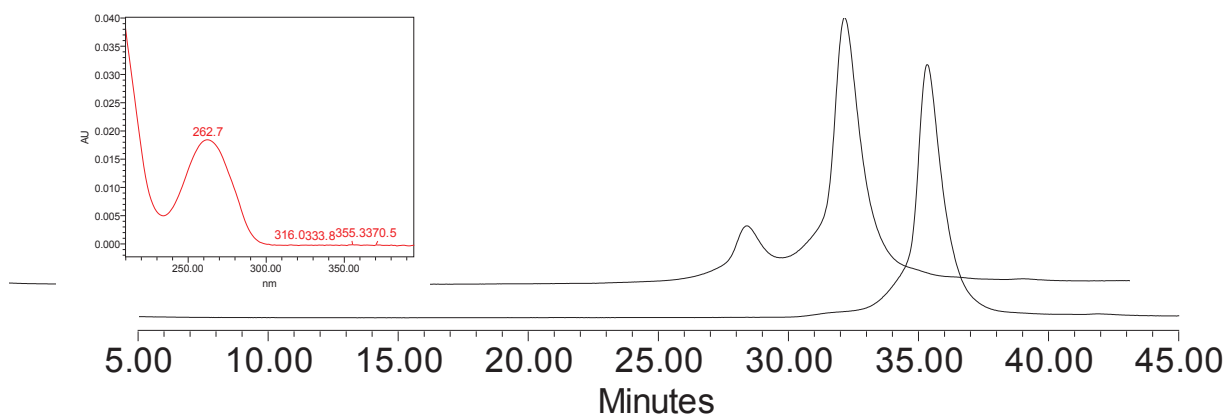

**Fig. S8** HPLC trace for hairpin **H<sub>61</sub>** at 280 nm at irradiation times of 0 and 45 min. First peak after 45 min irradiation is (2+2) adduct, second peak is starting material. UV of the (2+2) adduct is shown in red.

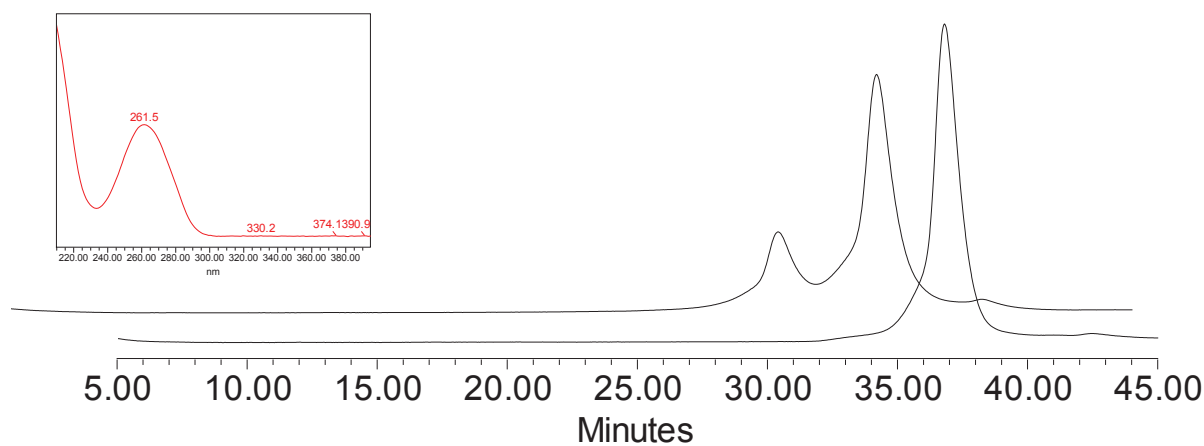

**Fig. S9** HPLC trace for hairpin **H<sub>62</sub>** at 280 nm at irradiation times of 0 and 45 min. First peak after 45 min irradiation is (2+2) adduct, second peak is starting material. UV of the (2+2) adduct is shown in red.

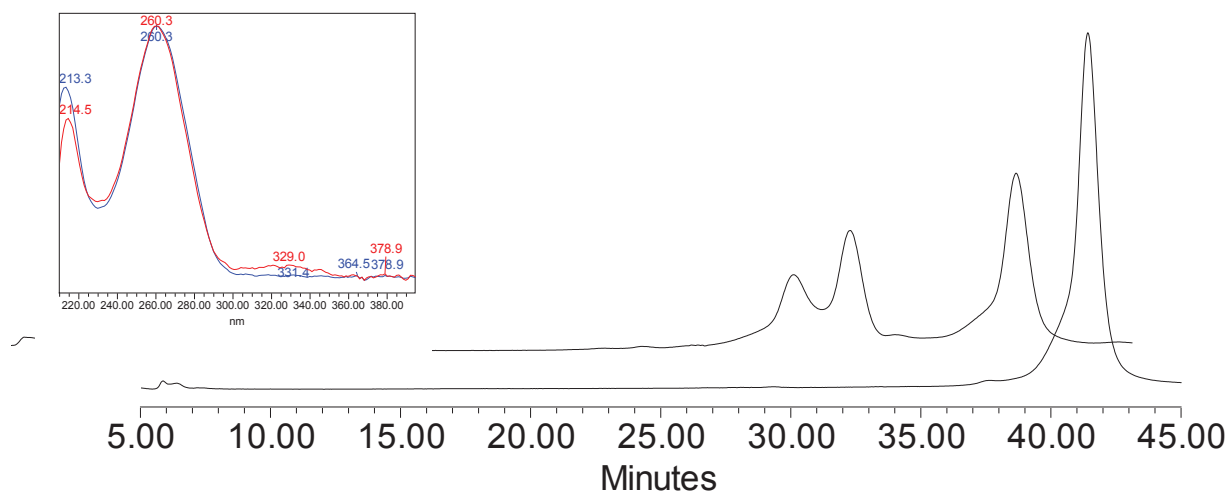

**Fig. S10** HPLC traces for hairpin **H<sub>63</sub>** at 280 nm at irradiation times of 0 and 45 min. First peak after 45 min is (6-4) adduct, second peak is (2+2) adduct, third peak is starting material. UV of the (6-4) and (2+2) adducts are shown in red and blue, respectively.

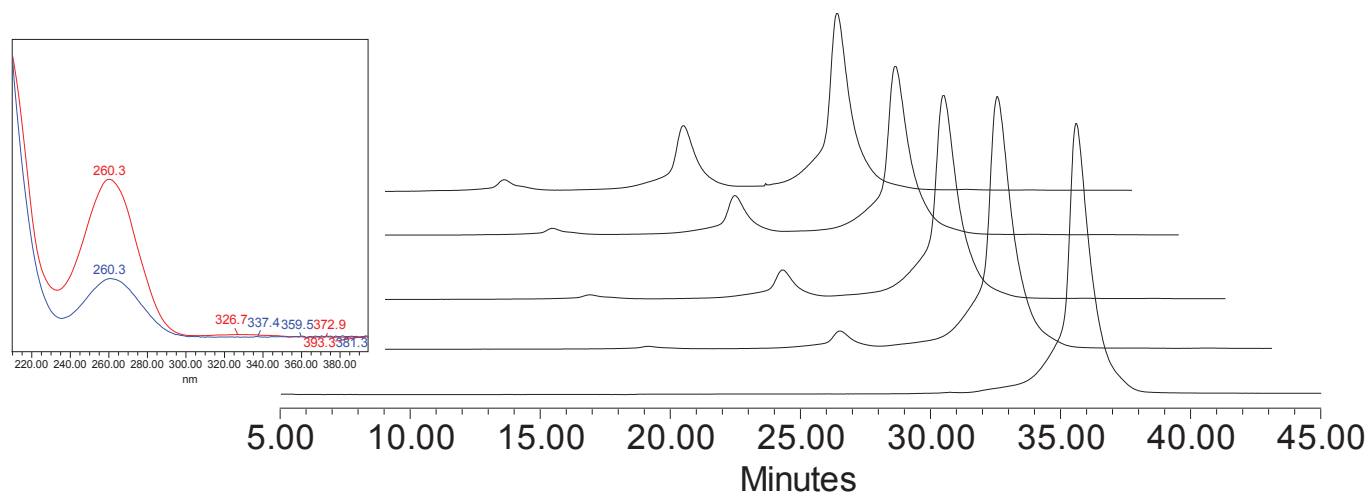

**Fig. S11** HPLC trace for hairpin **H<sub>41</sub>** at 280 nm with increasing irradiation time (0, 10, 20, 30 and 40 min). First peak is the (6-4) adduct and second peak is the starting material. UV of the (6-4) adduct is shown in red.

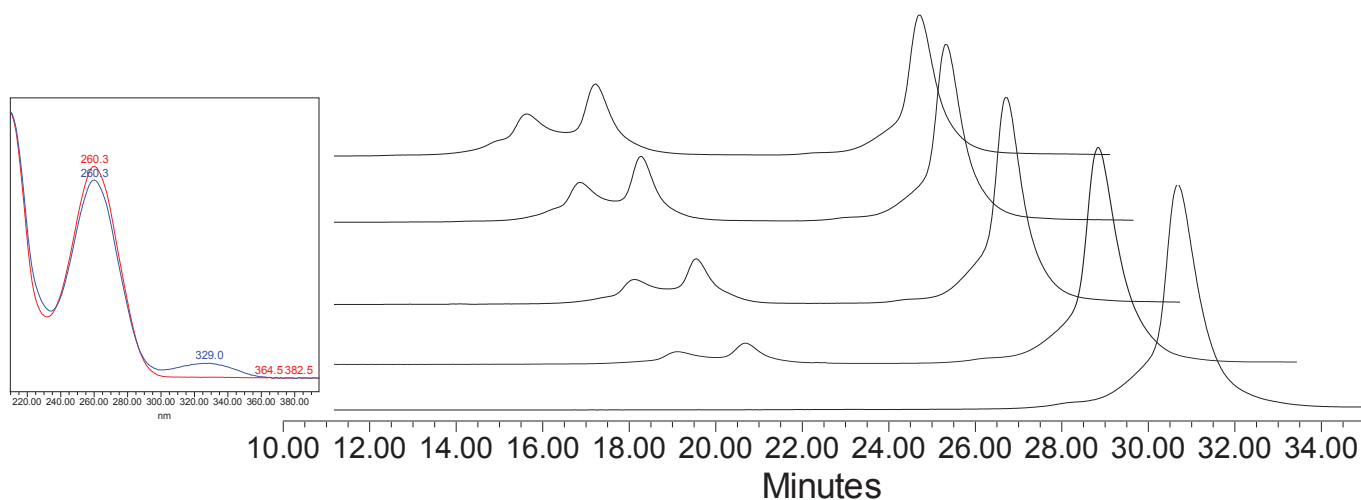

**Fig. S12** HPLC trace for hairpin **H<sub>42</sub>** at 280 nm with increasing irradiation time (0, 10, 20, 30 and 40 min). First peak is the (2+2) adduct and second peak is the starting material. UV of the (2+2) adduct is shown in blue and starting material in red.

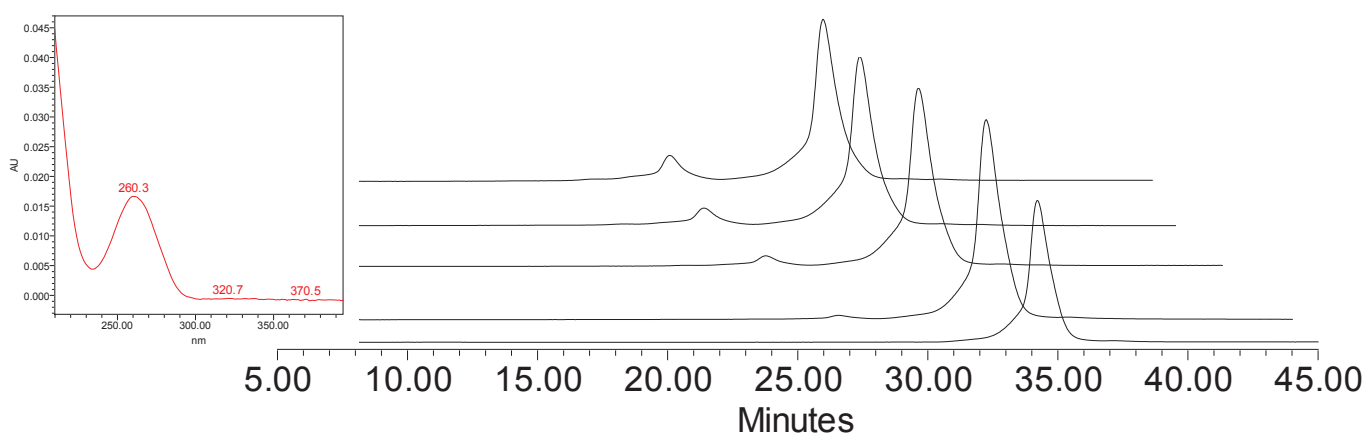

**Fig. S13** HPLC trace for hairpin **H<sub>43</sub>** at 280 nm with increasing irradiation time (0, 10, 20, 30 and 40 min). First peak is the (6-4) adduct, second peak the (2+2) adduct and third peak is the starting material. UV of the (2+2) adduct is shown in red and (6-4) adduct in blue.

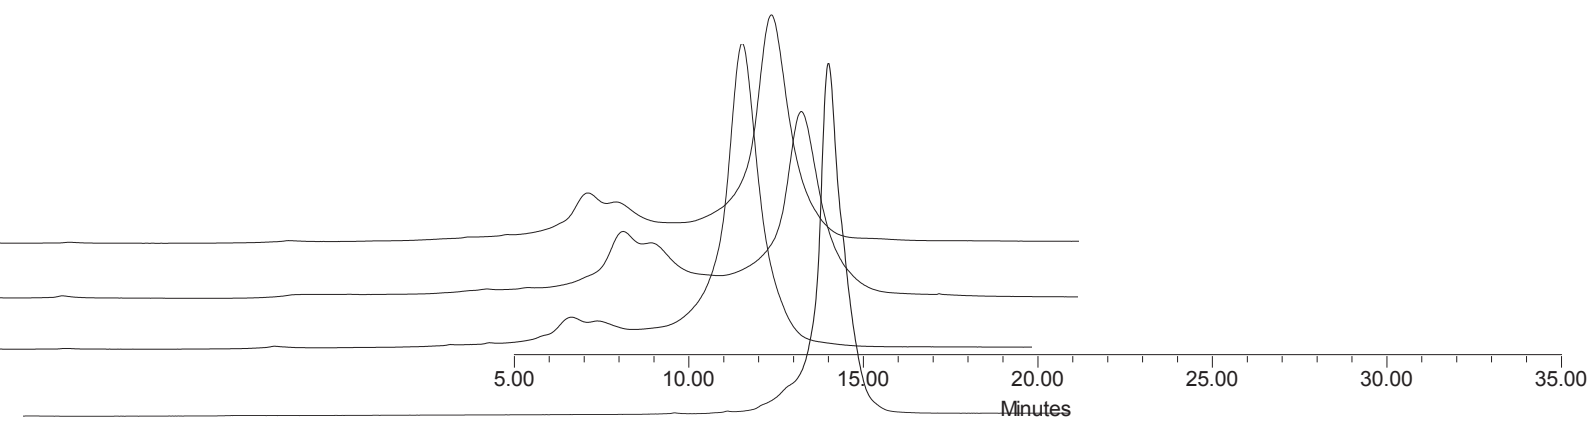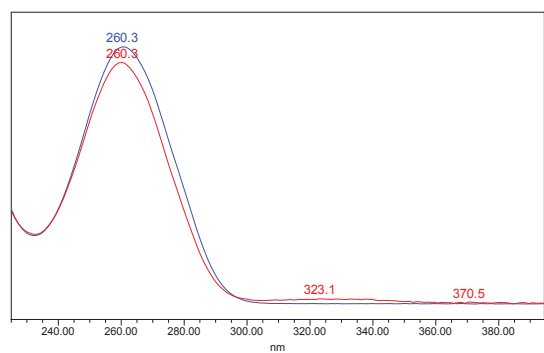

**Fig. S14** HPLC trace for hairpin **L<sub>6</sub>1** at 280 nm with increasing irradiation time (0, 10, 20 and 30 min). First peak is the (2+2) adduct, second peak the (6-4) adduct and third peak is the starting material. UV of the (2+2) adduct is shown in blue and (6-4) adduct in red.

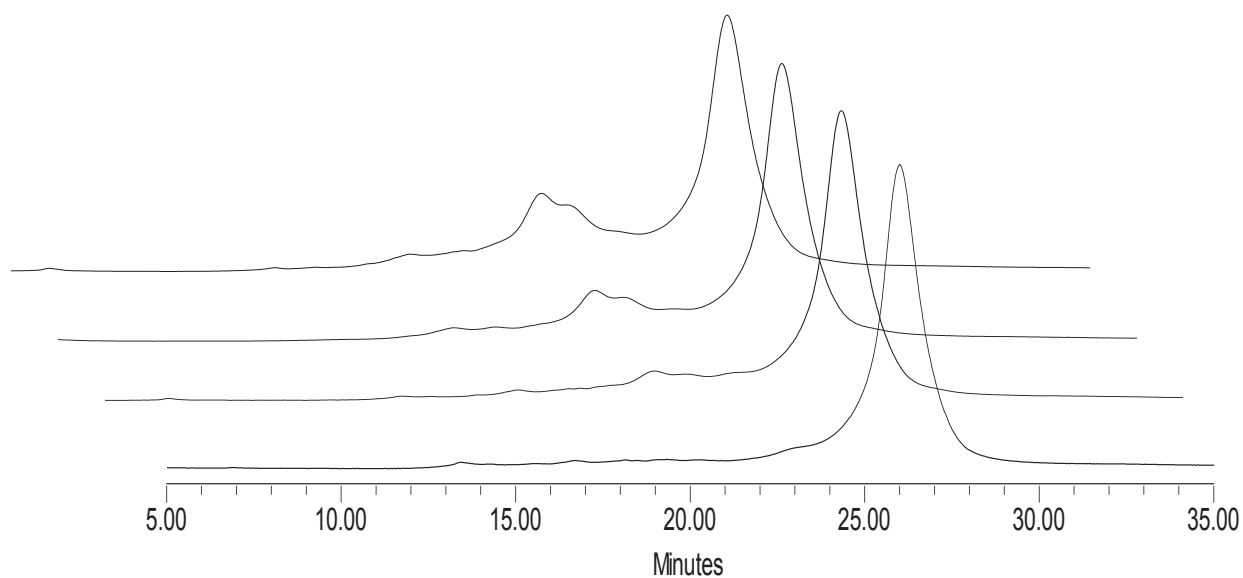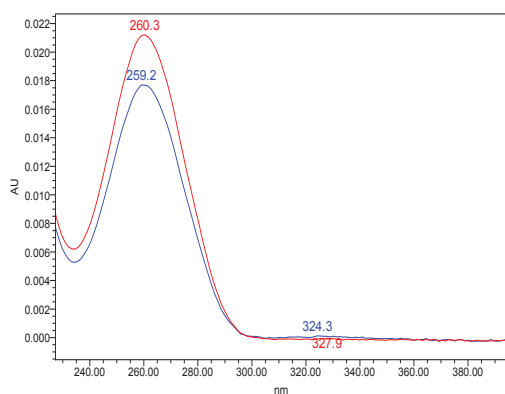

**Fig. S15** HPLC trace hairpin **L<sub>6</sub>2** at 280 nm with increasing irradiation time (0, 10, 20 and 30 min). First peak is the (2+2) adduct, second peak the (6-4) adduct and third peak is the starting material. UV of the (2+2) adduct is shown in blue and (6-4) adduct in red.

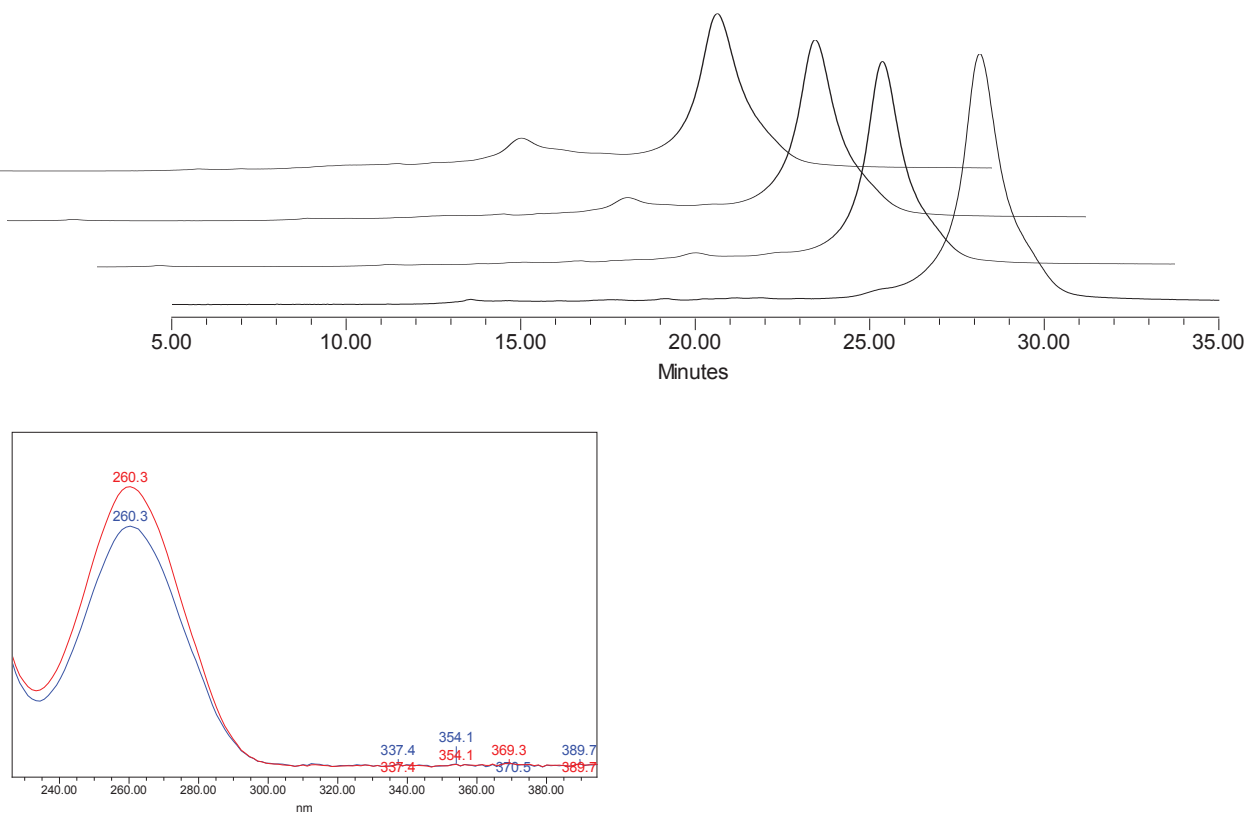

**Fig. S16** HPLC trace for hairpin **L<sub>6</sub>3** at 280 nm with increasing irradiation time (0, 10, 20 and 30 min). First peak is the (2+2) adduct, the second peak is the starting material. UV of the (2+2) adduct is shown in blue and (the starting material adduct in red).

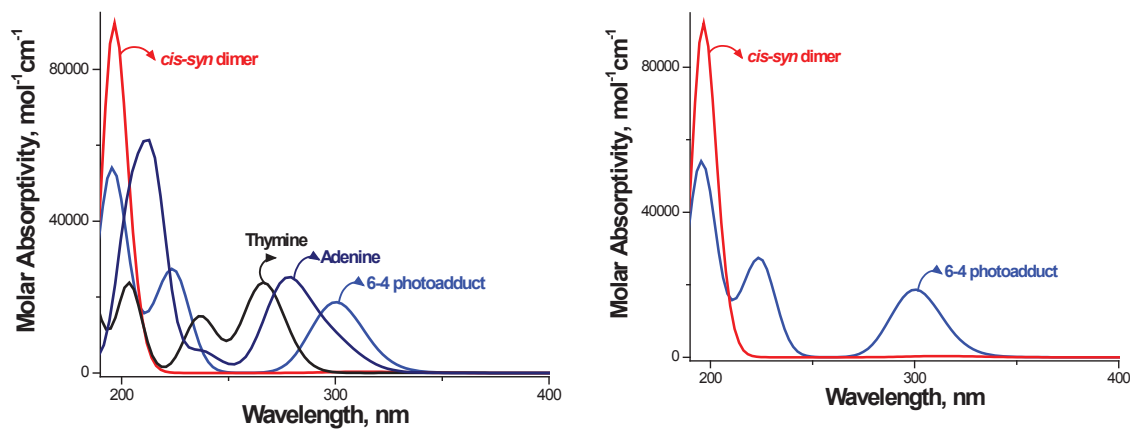

**Fig. S17** Calculated electronic absorption spectra of thymine, adenine, 2+2 and 6-4 photoproducts.
